# Supplementary material for: Roles of the low density lipoprotein receptor and related receptors in inhibition of lipoprotein(a) internalization by proprotein convertase subtilisin/kexin type 9
Source: PubMed Central journal article supplement (PMC5531514; doi:10.1371/journal.pone.0180869), 2017-07-27
Supplement: pone.0180869.s001.pdf [file pone.0180869.s001.pdf]

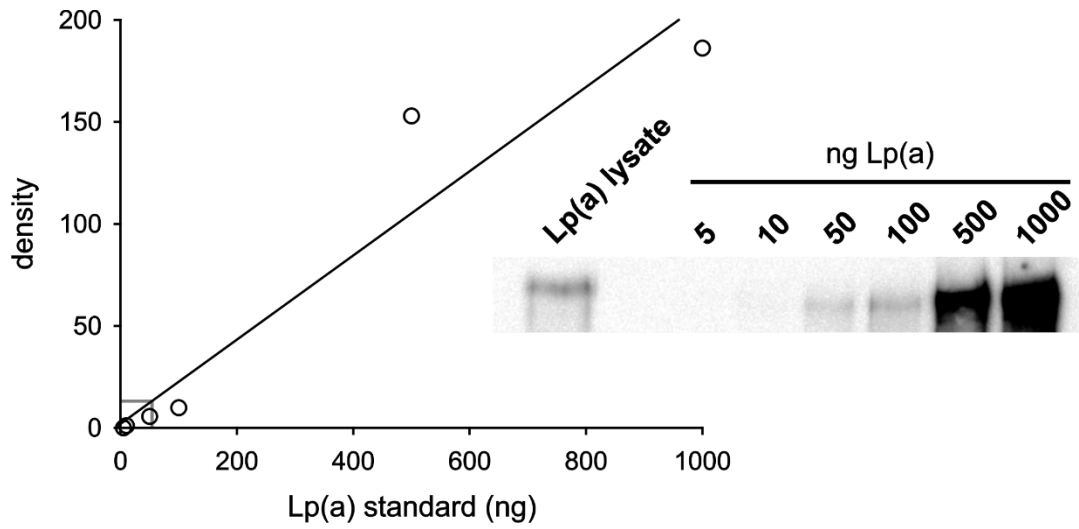

**S1 Fig. Quantitative analysis of Lp(a) internalization.** Western blot analysis was performed on a series of samples representing different quantities of purified Lp(a) as well as a lysate of HepG2 cells exposed to 10  $\mu\text{g}/\text{mL}$  Lp(a) for 4 hours. The grey lines represent the interpolated quantity of Lp(a) from the density of the Lp(a) lysate band.
